# Supplementary material for: Lutein is needed for efficient chlorophyll triplet quenching in the major LHCII antenna complex of higher plants and effective photoprotection in vivo under strong light
Source: PubMed Central journal article supplement (PMC1769499; doi:10.1186/1471-2229-6-32), 2006-12-27
Supplement: 1471-2229-6-32-S1.pdf [file 1471-2229-6-32-S1.pdf]

**Table a1. Pigment composition of leaf tissue from WT and mutant genotypes, both dark adapted, and after light stress (1200  $\mu\text{mol m}^{-2} \text{s}^{-1}$ , 20' at RT).**

Data are normalized to 100 Chl *a+b* molecules, and are expressed as mean  $\pm$  SD, n=3. See Methods for details. Abbreviations: beta,  $\beta$ -carotene. nd, not detected.

| Genotypes                                                                 |                    | Chl a/b       | Chl/Car       | Neo           | Viola         | Anthera       | Lute           | Zea           | beta-Car       |
|---------------------------------------------------------------------------|--------------------|---------------|---------------|---------------|---------------|---------------|----------------|---------------|----------------|
| dark-adapted leaves                                                       | WT                 | 3.1 $\pm$ 0.1 | 3.4 $\pm$ 0.1 | 5.7 $\pm$ 0.6 | 3.3 $\pm$ 0.1 | nd            | 11.8 $\pm$ 0.1 | nd            | 8.7 $\pm$ 0.4  |
|                                                                           | <i>lut2.1</i>      | 3.6 $\pm$ 0.1 | 3.5 $\pm$ 0.1 | 5.3 $\pm$ 0.5 | 9.8 $\pm$ 0.8 | 0.9 $\pm$ 0.1 | nd             | 0.3 $\pm$ 0.1 | 12.2 $\pm$ 0.1 |
|                                                                           | <i>npq1</i>        | 3.1 $\pm$ 0.1 | 4.5 $\pm$ 0.2 | 4.4 $\pm$ 0.3 | 2.6 $\pm$ 0.3 | nd            | 9.6 $\pm$ 0.9  | nd            | 8.2 $\pm$ 0.1  |
|                                                                           | <i>npq1 lut2.1</i> | 3.6 $\pm$ 0.1 | 3.6 $\pm$ 0.1 | 4.9 $\pm$ 0.1 | 9.2 $\pm$ 0.3 | 0.8 $\pm$ 0.3 | nd             | 0.4 $\pm$ 0.1 | 12.8 $\pm$ 0.2 |
| light-treated leaves<br>(20', 1200 $\mu\text{mol m}^{-2} \text{s}^{-1}$ ) | WT                 | 3.1 $\pm$ 0.1 | 3.4 $\pm$ 0.1 | 5.1 $\pm$ 0.3 | 1.4 $\pm$ 0.1 | 0.4 $\pm$ 0.1 | 12.2 $\pm$ 0.2 | 1.7 $\pm$ 0.1 | 8.9 $\pm$ 0.3  |
|                                                                           | <i>lut2.1</i>      | 3.5 $\pm$ 0.1 | 3.6 $\pm$ 0.1 | 4.3 $\pm$ 0.6 | 4.7 $\pm$ 0.1 | 1.3 $\pm$ 0.2 | nd             | 5.1 $\pm$ 0.1 | 12.6 $\pm$ 0.2 |
|                                                                           | <i>npq1</i>        | 3.1 $\pm$ 0.1 | 4.3 $\pm$ 0.1 | 4.4 $\pm$ 0.3 | 2.6 $\pm$ 0.3 | nd            | 9.7 $\pm$ 0.8  | nd            | 8.1 $\pm$ 0.4  |
|                                                                           | <i>npq1 lut2.1</i> | 3.6 $\pm$ 0.1 | 4.2 $\pm$ 0.1 | 5.0 $\pm$ 0.7 | 9.6 $\pm$ 0.1 | 0.9 $\pm$ 0.3 | nd             | 0.4 $\pm$ 0.1 | 11.0 $\pm$ 0.9 |
