# Supplementary material for: Lutein is needed for efficient chlorophyll triplet quenching in the major LHCII antenna complex of higher plants and effective photoprotection in vivo under strong light
Source: PubMed Central journal article supplement (PMC1769499; doi:10.1186/1471-2229-6-32), 2006-12-27
Supplement: 1471-2229-6-32-S3.pdf [file 1471-2229-6-32-S3.pdf]

**Table a3. Pigment composition and stability to heat denaturation of fractions obtained by preparative IEF of monomeric Lhcb isolated from WT and *lut2.1*.**

Data are normalized to 100 Chl *a+b* molecules, and are expressed as mean  $\pm$  SD, n=3. Thermal stability was measured by heat denaturation dependence of the major CD signal at 492 nm. nd, not detected. See Experimental Procedures for details.

| <b>fractions</b>             | <b>Chl <i>a/b</i></b> | <b>Chl/Car</b> | <b>Neo</b>    | <b>Viola</b>   | <b>Anthera</b> | <b>Lute</b>    | <b>Zea</b>    | <b>stability (°C)</b> |
|------------------------------|-----------------------|----------------|---------------|----------------|----------------|----------------|---------------|-----------------------|
| <b>WT - fr. 1</b>            | 1,4 $\pm$ 0,1         | 4,5 $\pm$ 0,1  | 5,9 $\pm$ 0,1 | 2,7 $\pm$ 0,1  | nd             | 13,7 $\pm$ 0,1 | nd            | 75,8 $\pm$ 0,8        |
| <b><i>lut2.1</i> - fr. 1</b> | 1,0 $\pm$ 0,1         | 4,7 $\pm$ 0,1  | 8,1 $\pm$ 0,1 | 9,8 $\pm$ 0,1  | 2,7 $\pm$ 0,1  | nd             | 0,9 $\pm$ 0,1 | 74,9 $\pm$ 1,0        |
| <b>WT - fr. 2</b>            | 1,3 $\pm$ 0,1         | 4,4 $\pm$ 0,1  | 5,8 $\pm$ 0,1 | 3,4 $\pm$ 0,2  | nd             | 13,6 $\pm$ 0,3 | nd            | 75,7 $\pm$ 0,6        |
| <b><i>lut2.1</i> - fr. 2</b> | 1,1 $\pm$ 0,1         | 4,5 $\pm$ 0,1  | 8,1 $\pm$ 0,1 | 10,0 $\pm$ 0,2 | 2,9 $\pm$ 0,2  | nd             | 1,1 $\pm$ 0,1 | 74,6 $\pm$ 0,8        |
| <b>WT - fr. 3</b>            | 1,5 $\pm$ 0,1         | 5,2 $\pm$ 0,1  | 4,1 $\pm$ 0,1 | 5,2 $\pm$ 0,1  | nd             | 9,9 $\pm$ 0,1  | nd            | 63,3 $\pm$ 0,2        |
| <b><i>lut2.1</i> - fr. 3</b> | 1,6 $\pm$ 0,1         | 4,9 $\pm$ 0,1  | 5,3 $\pm$ 0,1 | 10,4 $\pm$ 0,2 | 3,2 $\pm$ 0,1  | nd             | 1,3 $\pm$ 0,1 | 65,8 $\pm$ 0,2        |
| <b>WT - fr. 4</b>            | 1,8 $\pm$ 0,1         | 5,4 $\pm$ 0,1  | 3,8 $\pm$ 0,1 | 3,8 $\pm$ 0,1  | nd             | 10,9 $\pm$ 0,1 | nd            | 59,1 $\pm$ 0,1        |
| <b><i>lut2.1</i> - fr. 4</b> | 1,8 $\pm$ 0,1         | 5,2 $\pm$ 0,1  | 5,0 $\pm$ 0,1 | 10,0 $\pm$ 0,3 | 3,3 $\pm$ 0,1  | nd             | 1,1 $\pm$ 0,1 | 58,9 $\pm$ 0,2        |
| <b>WT - fr. 5</b>            | 2,0 $\pm$ 0,1         | 6,6 $\pm$ 1,5  | 5,7 $\pm$ 0,2 | 2,2 $\pm$ 0,1  | nd             | 7,2 $\pm$ 0,3  | nd            | 60,6 $\pm$ 0,1        |
| <b><i>lut2.1</i> - fr. 5</b> | 1,9 $\pm$ 0,1         | 5,2 $\pm$ 0,1  | 5,5 $\pm$ 0,2 | 7,6 $\pm$ 0,1  | 4,3 $\pm$ 0,2  | nd             | 1,9 $\pm$ 0,1 | 60,6 $\pm$ 0,2        |
