# Supplementary material for: Lutein is needed for efficient chlorophyll triplet quenching in the major LHCII antenna complex of higher plants and effective photoprotection in vivo under strong light
Source: PubMed Central journal article supplement (PMC1769499; doi:10.1186/1471-2229-6-32), 2006-12-27
Supplement: 1471-2229-6-32-S4.pdf [file 1471-2229-6-32-S4.pdf]

**Table a4. Leaf pigment composition of 3-weeks-old WT and *lut2.1* plants grown for three additional weeks LL (120  $\mu\text{mol m}^{-2} \text{s}^{-1}$ ) or HL (1400  $\mu\text{mol m}^{-2} \text{s}^{-1}$ ) conditions.**

Data are normalized to 100 Chl *a+b* molecules. Abbreviations: beta,  $\beta$ -carotene; nd, not detected. Data are expressed as mean  $\pm$  SD, n=3.

|                                   | <b>Chl <i>a/b</i></b> | <b>Chl/Car</b> | <b>Neo</b>     | <b>Viola</b>   | <b>Anthera</b> | <b>Lute</b>    | <b>Zea</b>    | <b>beta-Car</b> |
|-----------------------------------|-----------------------|----------------|----------------|----------------|----------------|----------------|---------------|-----------------|
| <b>WT - 3 weeks HL</b>            | 3.5 $\pm$ 0.3         | 1.3 $\pm$ 0.1  | 14,6 $\pm$ 1,4 | 9,2 $\pm$ 0,4  | 0,7 $\pm$ 0,2  | 31,6 $\pm$ 1,6 | 0,5 $\pm$ 0,2 | 19,1 $\pm$ 1,2  |
| <b>WT - 3 weeks LL</b>            | 3.1 $\pm$ 0.1         | 3.7 $\pm$ 0.1  | 6,9 $\pm$ 0,5  | 4,0 $\pm$ 0,7  | nd             | 12,3 $\pm$ 0,5 | nd            | 4,0 $\pm$ 0,3   |
| <b><i>lut2.1</i> - 3 weeks HL</b> | 4.0 $\pm$ 0.2         | 1.0 $\pm$ 0.2  | 17,8 $\pm$ 0,6 | 29,9 $\pm$ 0,8 | 7,5 $\pm$ 3,6  | nd             | 6,9 $\pm$ 1,9 | 35,5 $\pm$ 6,1  |
| <b><i>lut2.1</i> - 3 weeks LL</b> | 3.5 $\pm$ 0.1         | 3.5 $\pm$ 0.1  | 8,2 $\pm$ 0,5  | 11,5 $\pm$ 0,4 | 2,0 $\pm$ 0,3  | nd             | 1,0 $\pm$ 0,2 | 5,9 $\pm$ 0,1   |
