# Supplementary material for: Lutein is needed for efficient chlorophyll triplet quenching in the major LHCII antenna complex of higher plants and effective photoprotection in vivo under strong light
Source: PubMed Central journal article supplement (PMC1769499; doi:10.1186/1471-2229-6-32), 2006-12-27
Supplement: 1471-2229-6-32-S5.pdf [file 1471-2229-6-32-S5.pdf]

**Table a5. Measurements of  $F_v/F_m$  ratio and chlorophyll content of WT and mutant leaves during growth at low temperature and different light conditions.**

$F_v/F_m$  ratio was recorded as index of photoinhibition of PSII. Chlorophyll content is expressed as mass of pigments ( $\mu\text{g}$ ) per unit leaf surface ( $\text{cm}^2$ ). Data refer to plants immediately prior to transfer at  $4^\circ\text{C}$  ( $t_0$ ) and after 1, 2 and 3 weeks of growth in HL ( $800 \mu\text{mol m}^{-2} \text{s}^{-1}$ ,  $4^\circ\text{C}$ ) or LL ( $20 \mu\text{mol m}^{-2} \text{s}^{-1}$ ,  $4^\circ\text{C}$ ). Data are expressed as mean  $\pm$  SD,  $n=6$ .

|           |                    | $F_v/F_m$ ratio   |                   |                   |                   | Chlorophyll content ( $\mu\text{g}/\text{cm}^2$ ) |                |                 |                 |
|-----------|--------------------|-------------------|-------------------|-------------------|-------------------|---------------------------------------------------|----------------|-----------------|-----------------|
|           |                    | $t_0$             | 1 week            | 2 weeks           | 3 weeks           | $t_0$                                             | 1 week         | 2 weeks         | 3 weeks         |
| <b>HL</b> | <b>WT</b>          | $0.807 \pm 0.014$ | $0.723 \pm 0.002$ | $0.767 \pm 0.003$ | $0.764 \pm 0.024$ | $17.9 \pm 1.9$                                    | $14.7 \pm 0.6$ | $21.2 \pm 1.3$  | $22.3 \pm 1.4$  |
|           | <i>npq1</i>        | $0.820 \pm 0.007$ | $0.602 \pm 0.021$ | $0.725 \pm 0.054$ | $0.766 \pm 0.018$ | $18.5 \pm 1.1$                                    | $16.2 \pm 2.4$ | $28.0 \pm 5.8$  | $26.2 \pm 5.4$  |
|           | <i>lut2.1</i>      | $0.815 \pm 0.008$ | $0.669 \pm 0.026$ | $0.760 \pm 0.040$ | $0.778 \pm 0.009$ | $18.7 \pm 0.4$                                    | $16.9 \pm 2.1$ | $23.6 \pm 2.7$  | $24.8 \pm 2.8$  |
|           | <i>npq1 lut2.1</i> | $0.800 \pm 0.01$  | $0.640 \pm 0.027$ | $0.781 \pm 0.007$ | $0.774 \pm 0.006$ | $20.7 \pm 1.6$                                    | $9.06 \pm 1.4$ | $19.4 \pm 3.0$  | $15.5 \pm 2.4$  |
| <b>LL</b> | <b>WT</b>          | $0.807 \pm 0.014$ | $0.795 \pm 0.006$ | $0.798 \pm 0.013$ | $0.797 \pm 0.011$ | $17.9 \pm 1.9$                                    | $20.5 \pm 1.2$ | $21.0 \pm 2.0$  | $23.3 \pm 2.1$  |
|           | <i>npq1</i>        | $0.820 \pm 0.007$ | $0.791 \pm 0.004$ | $0.785 \pm 0.014$ | $0.785 \pm 0.007$ | $18.5 \pm 1.1$                                    | $22.2 \pm 1.2$ | $31.2 \pm 3.55$ | $28.7 \pm 3.27$ |
|           | <i>lut2.1</i>      | $0.815 \pm 0.008$ | $0.807 \pm 0.020$ | $0.810 \pm 0.017$ | $0.817 \pm 0.014$ | $18.7 \pm 3.9$                                    | $19.1 \pm 1.6$ | $23.7 \pm 5.3$  | $22.3 \pm 3.6$  |
|           | <i>npq1 lut2.1</i> | $0.800 \pm 0.010$ | $0.800 \pm 0.016$ | $0.829 \pm 0.021$ | $0.791 \pm 0.010$ | $20.7 \pm 1.6$                                    | $19.4 \pm 1.3$ | $25.3 \pm 2.2$  | $24.1 \pm 2.1$  |
