# Supplementary material for: Lutein is needed for efficient chlorophyll triplet quenching in the major LHCII antenna complex of higher plants and effective photoprotection in vivo under strong light
Source: PubMed Central journal article supplement (PMC1769499; doi:10.1186/1471-2229-6-32), 2006-12-27

**Figure a1. Kinetics of NPQ.** *In vivo* Non-Photochemical Quenching of chlorophyll fluorescence was induced by saturating actinic light ( $1200 \mu\text{mol m}^{-2} \text{s}^{-1}$ ) on WT and mutant leaves. The values of NPQ were calculated as described in Experimental Procedures. Measures were repeated at least on 4 leaves.

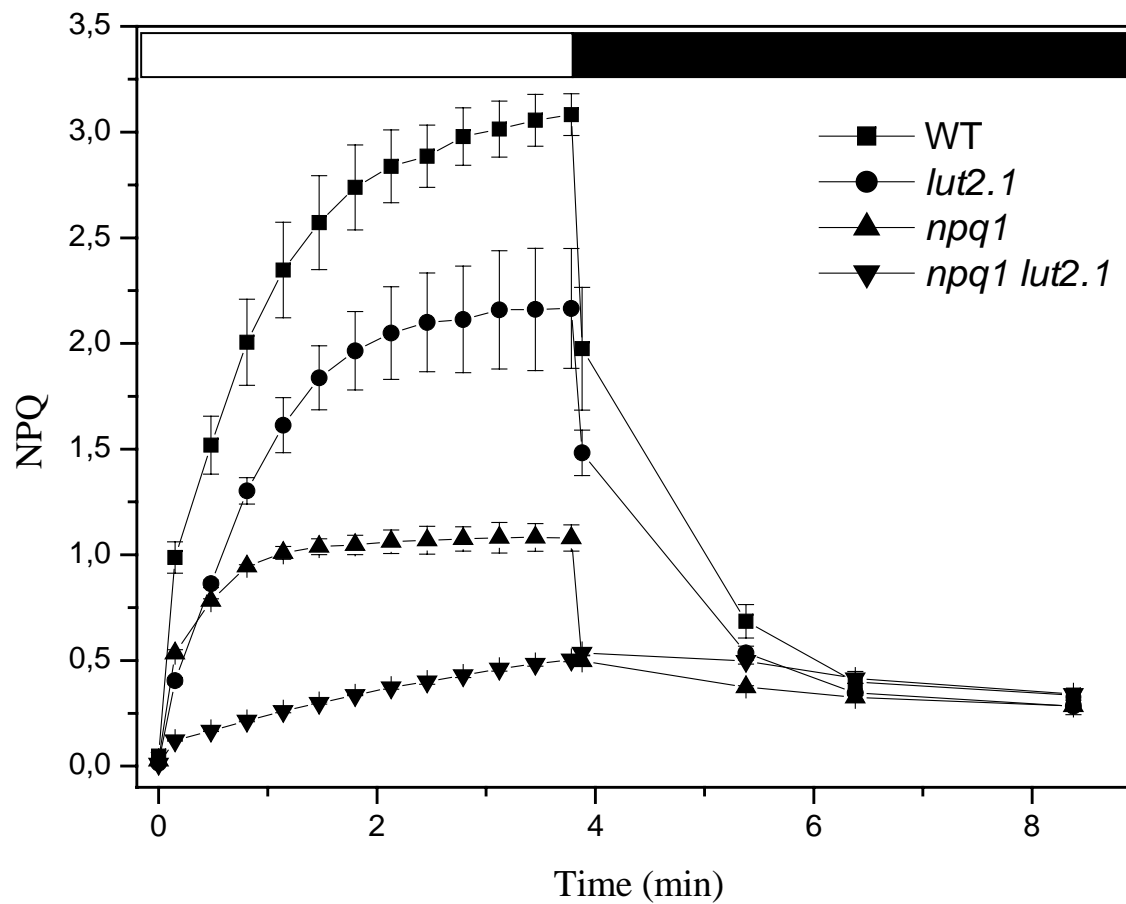

Supplement: 1471-2229-6-32-S6.pdf [file 1471-2229-6-32-S6.pdf]
